# Supplementary material
Source: publisher site journal article supplement (https://www.dovepress.com/article/267007)
Supplement: Supplementary file 1 [file get_supplementary_file.php]

**Supplementary Figure 1** Animal bodyweight of experimental animals in the first day of NPs injection, measured before i.p. injection (Day 0). Bodyweight of female and male animals indicate expectable sex differences, being marginal differences observed between the experimental groups for each sex. Data is represented as mean ± SEM (n=3-4; non significant differences; one-way ANOVA followed by Holm-Sidak’s post-test).

**
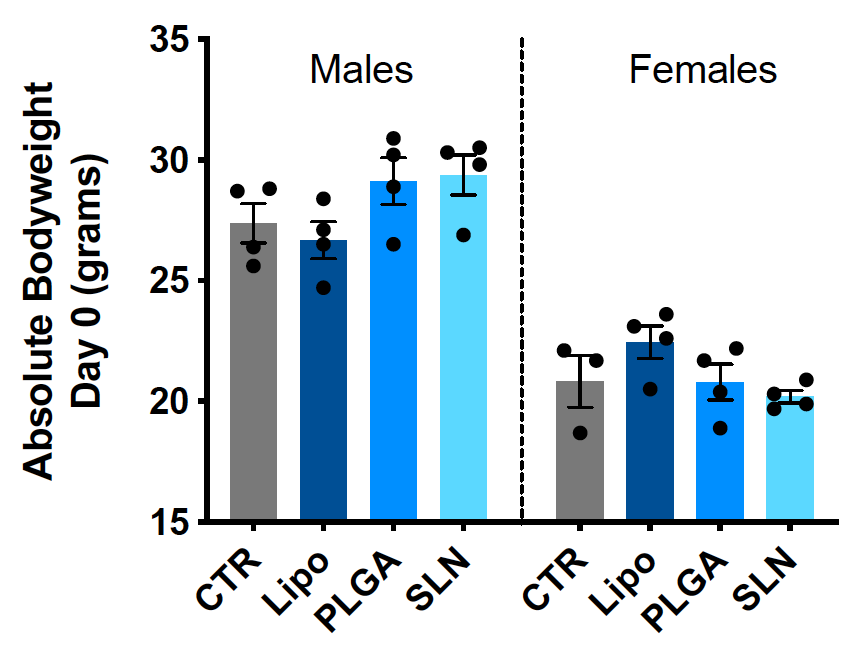
**

**Supplementary Table 1** Full description of NPs accumulation and lesions characterization in all organs from tested animals. Indication, classification and score of histopathological findings and NPs distribution for slices obtained from the organs of experimental animals.

| ID | Organ | Diagnosis | Score | Golden NP Accumulation | Classification of the lesion |
| --- | --- | --- | --- | --- | --- |
| CTR Male 1 | Brain | Thyroid: micro and macro intracytoplasmatic vacuoles, follicular cells, multifocal to coalescing, mild | 2 | 0 | Background lesion, non-adverse |
| Kidney | No changes | 0 | 0 | - |
| Lung | No changes | 0 | 0 | - |
| Thymus | No changes | 0 | 0 | - |
| Spleen | No changes | n.a | 0 | - |
| Heart | No changes | 0 | 0 | - |
| Liver | Liver: Mononuclear inflammator cell infiltration; Hepatocellular necrosis; focal | 1 | 0 | Background lesion, non-adverse |
| CTR Male 2 | Brain | No changes | 0 | 0 | - |
| Kidney | Kidney: Mononuclear inflammatory cell infiltration, cortical, perivascular, multifocal | 2 | 0 | Background lesion, non-adverse |
| Lung | No changes | 0 | 0 | - |
| Thymus | No changes | 0 | 0 | - |
| Spleen | Spleen: Hemossiderosis, multifocal; mild; Adipose tissue: Mononuclear inflammatory cell infiltration, focally extensive | n.a | 0 | Background lesion, non-adverse |
| Heart | Heart: Mineralization, atrium, focal | n.a | 0 | Background lesion, non-adverse |
| Liver | Liver: Mononuclear inflammator cell infiltration; multifocal | 2 | 0 | Background lesion, non-adverse |
| CTR Male 3 | Brain | No changes | 0 | 0 | - |
| Kidney | No changes | 0 | 0 | - |
| Lung | No changes | 0 | 0 | - |
| Thymus | No changes | 0 | 0 | - |
| Spleen | No changes | n.a | 0 | - |
| Heart | No changes | 0 | 0 | - |
| Liver | Liver: Hepatocyte, glycogen depletion; diffuse | n.a | 0 | Background lesion, non-adverse |
| CTR Male 4 | Brain | No changes | 0 | 0 | - |
| Brain | No changes | 0 | 0 | - |
| Lung | No changes | 0 | 0 | - |
| Thymus | No changes | 0 | 0 | - |
| Spleen | Spleen: Hemossiderosis, multifocal, minimal | n.a | 0 | Background lesion, non-adverse |
| Heart | Heart: lipofuscin accumulation, cardiomyocyte, minimal | 1 | 0 | Background lesion, non-adverse |
| Liver | Liver: Mononuclear inflammatory cell infiltration; multifocal, minimal; hepatocyte, glycogen depletion, diffuse, moderate | 1 | 0 | Background lesion, non-adverse |
| CTR Female 1 | Brain | No changes | 0 | 0 | - |
| Kidney | No changes | 0 | 0 | - |
| Lung | No changes | 0 | 0 | - |
| Thymus | No changes | 0 | 0 | - |
| Spleen | Spleen: Hemossiderosis, multifocal, mild | n.a | 0 | Background lesion, non-adverse |
| Heart | No changes | 0 | 0 | - |
| Liver | Liver: Glycogen depletion, diffuse, moderate | n.a | 0 | Background lesion, non-adverse |
| CTR Female 2 | Brain | No changes | 0 | 0 | - |
| Kidney | Kidney: Mononuclear inflammatory cell infiltration, focal | 2 | 0 | Background lesion, non-adverse |
| Lung | No changes | 0 | 0 | - |
| Thymus | No changes | 0 | 0 | - |
| Spleen | Spleen: Hemossiderosis, multifocal, minimal | n.a | 0 | Background lesion, non-adverse |
| Heart | No changes | 0 | 0 | - |
| Liver | Liver: Mononuclear inflammator cell infiltration; Hepatocellular necrosis; focal; hepatocyte, glycogen depletion, diffuse | 1 | 0 | Background lesion, non-adverse |
| CTR Female 3 | Brain | No changes | 0 | 0 | - |
| Kidney | No changes | 0 | 0 | - |
| Lung | No changes | 0 | 0 | - |
| Thymus | No changes | 0 | 0 | - |
| Spleen | Spleen: Hemossiderosis, multifocal, minimal | n.a | 0 | Background lesion, non-adverse |
| Heart | No changes | 0 | 0 | - |
| Liver | Liver: Mononuclear inflammator cell infiltration; Hepatocellular necrosis; focal; hepatocyte, glycogen depletion, diffuse | 2 | 0 | Background lesion, non-adverse |
| Lipo Male 1 | Brain | No changes | 0 | 0 | - |
| Kidney | No changes | 0 | 0 | - |
| Lung | No changes | 0 | 0 | - |
| Thymus | No changes | 0 | 0 | - |
| Spleen | Spleen: Hemossiderosis, multifocal; mild; Adipose tissue: Mononuclear inflammatory cell infiltration, focally extensive | n.a | 0 | Background lesion, non-adverse |
| Heart | No changes | 0 | 0 | - |
| Liver | Liver: Mononuclear inflammator cell infiltration; Hepatocellular necrosis; multifocal, mild hepatocyte, glycogen depletion, diffuse | 2 | 0 | Background lesion, non-adverse |
| Lipo Male 2 | Brain | No changes | 0 | 0 | - |
| Kidney | Adipose tissue: Steatisis, granulomatous, chronic, focally extensive, minimal | 1 | 0 | Background lesion, non-adverse |
| Lung | No changes | 0 | 0 | - |
| Thymus | No changes | 0 | 0 | - |
| Spleen | Spleen: Hemossiderosis, multifocal; mild; Adipose tissue: Mononuclear inflammatory cell infiltration, focally extensive; Golden nanoparticles accumulation, red pulp; multifocal, minimal | n.a | 1 | Background lesion, non-adverse |
| Heart | No changes | 0 | 0 | - |
| Liver | Liver: Mononuclear inflammator cell infiltration; Hepatocellular necrosis; multifocal, mild; hepatocyte, glycogen depletion, diffuse | 2 | 0 | Background lesion, non-adverse |
| Lipo Male 3 | Brain | No changes | 0 | 0 | - |
| Kidney | No changes | 0 | 0 | - |
| Lung | No changes | 0 | 0 | - |
| Thymus | No changes | 0 | 0 | - |
| Spleen | Spleen: Hemossiderosis, multifocal, minimal | n.a | 0 | Background lesion, non-adverse |
| Heart | No changes | 0 | 0 | - |
| Liver | Liver: Mononuclear inflammator cell infiltration; Hepatocellular necrosis; multifocal, mild; hepatocyte, glycogen depletion, diffuse | 2 | 0 | Background lesion, non-adverse |
| Lipo Male 4 | Brain | No changes | 0 | 0 | - |
| Kidney | No changes | 0 | 0 | - |
| Lung | No changes | 0 | 0 | - |
| Thymus | No changes | 0 | 0 | - |
| Spleen | Spleen: Hemossiderosis, multifocal; mild; Adipose tissue: Mononuclear inflammatory cell infiltration, focally extensive | n.a | 0 | Background lesion, non-adverse |
| Heart | No changes | 0 | 0 | - |
| Liver | Liver: Mononuclear inflammator cell infiltration; Hepatocellular necrosis; multifocal, minimal; hepatocyte, glycogen depletion, diffuse | 1 | 0 | Background lesion, non-adverse |
| Lipo Female 1 | Brain | No changes | 0 | 1 | - |
| Kidney | No changes | 0 | 0 | - |
| Lung | No changes | 0 | 0 | - |
| Thymus | No changes | 0 | 0 | - |
| Spleen | Spleen: Hemossiderosis, multifocal; mild; Adipose tissue: Mononuclear inflammatory cell infiltration, focally extensive | n.a | 0 | Background lesion, non-adverse |
| Heart | Pericardium: Mononuclear inflammatory cell infiltration, multifocal | 2 | 0 | Background lesion, non-adverse |
| Liver | Liver: Mononuclear inflammator cell infiltration; Hepatocellular necrosis; multifocal, minimal; hepatocyte, glycogen depletion, diffuse | 1 | 0 | Background lesion, non-adverse |
| Lipo Female 2 | Brain | No changes | 0 | 1 | - |
| Kidney | No changes | 0 | 0 | - |
| Lung | Peripleura: Mononuclear inflammatory cell infiltration, multifocal | 2 | 0 | Background lesion, non-adverse |
| Thymus | No changes | 0 | 0 | - |
| Spleen | Spleen: Hemossiderosis, multifocal, mild | n.a | 0 | Background lesion, non-adverse |
| Heart | No changes | 0 | 0 | - |
| Liver | Liver: Mononuclear inflammator cell infiltration; Hepatocellular necrosis; multifocal, mild; hepatocyte, glycogen depletion, diffuse | 2 | 0 | Background lesion, non-adverse |
| Lipo Female 3 | Brain | No changes | 0 | 1 | - |
| Kidney | Kidney: Mononuclear inflammatory cell infiltration, multifocal, perivascular | 2 | 0 | Background lesion, non-adverse |
| Lung | No changes | 0 | 0 | - |
| Thymus | No changes | 0 | 0 | - |
| Spleen | Spleen: Hemossiderosis, multifocal; mild; Adipose tissue: Mononuclear inflammatory cell infiltration, focally extensive | n.a | 0 | Background lesion, non-adverse |
| Heart | No changes | 0 | 0 | - |
| Liver | Liver: Mononuclear inflammator cell infiltration; Hepatocellular necrosis; multifocal, minimal; hepatocyte, glycogen depletion, diffuse | 1 | 0 | Background lesion, non-adverse |
| Lipo Female 4 | Brain | No changes | 0 | 1 | - |
| Kidney | No changes | 0 | 0 | - |
| Lung | No changes | 0 | 0 | - |
| Thymus | No changes | 0 | 0 | - |
| Spleen | Spleen: Hemossiderosis, multifocal; mild; Adipose tissue: Mononuclear inflammatory cell infiltration, focally extensive | n.a | 0 | Background lesion, non-adverse |
| Heart | No changes | 0 | 0 | - |
| Liver | Liver: Mononuclear inflammatory cell infiltration, multifocal; hepatocyte, glycogen deplition, diffuse | 1 | 0 | Background lesion, non-adverse |
| PLGA Male 1 | Brain | No changes | 0 | 1 | - |
| Kidney | No changes | 0 | 0 | - |
| Lung | No changes | 0 | 0 | - |
| Thymus | No changes | 0 | 0 | - |
| Spleen | Adipose tissue: Steatitis, multifocal, chronic, mild | n.a | 0 | No toxicologic effect |
| Heart | No changes | 0 | 0 | - |
| Liver | Liver: Mononuclear inflammatory cell infiltration, multifocal | 1 | 0 | Background lesion, non-adverse |
| PLGA Male 2 | Brain | No changes | 0 | 1 | - |
| Kidney | No changes | 0 | 0 | - |
| Lung | No changes | 0 | 0 | - |
| Thymus | No changes | 0 | 0 | - |
| Spleen | Spleen: Hemossiderosis, multifocal; mild; Adipose tissue: Mononuclear inflammatory cell infiltration, focally extensive | n.a | 0 | Background lesion, non-adverse |
| Heart | No changes | 0 | 0 | - |
| Liver | Liver: Mononuclear inflammator cell infiltration; Hepatocellular necrosis; multifocal, minimal; hepatocyte, glycogen depletion, diffuse | 1 | 0 | Background lesion, non-adverse |
| PLGA Male 3 | Brain | No changes | 0 | 1 | - |
| Kidney | No changes | 0 | 0 | - |
| Lung | No changes | 0 | 0 | - |
| Thymus | No changes | 0 | 0 | - |
| Spleen | Spleen; Hemossiderosis, multifocal, mild; Golden Nanoparticles acumulation, multifocal, macrophages (red pulp) and endothelial cells, minimal. | n.a | 1 | Background lesion, non-adverse |
| Heart | No changes | 0 | 0 | - |
| Liver | Liver: Mononuclear inflammator cell infiltration; Hepatocellular necrosis; multifocal, minimal; hepatocyte, glycogen depletion, diffuse | 1 | 0 | Background lesion, non-adverse |
| PLGA Male 4 | Brain | No changes | 0 | 1 | - |
| Kidney | Kidney: Mononuclear inflammatory cell infitlration, medulla, focally extensive | 2 | 0 | Background lesion, non-adverse |
| Lung | No changes | 0 | 0 | - |
| Thymus | No changes | 0 | 0 | - |
| Spleen | Spleen; Hemossiderosis, multifocal, mild; Golden Nanoparticles acumulation, multifocal, macrophages (red pulp) and endothelial cells, minimal; Adipose tissue: Mononuclear inflammatory cell infiltration, focally extensive | n.a | 1 | Background lesion, non-adverse |
| Heart | No changes | 0 | 0 | - |
|  | Liver | Liver: hepatocyte, glycogen depletion; diffuse | n.a | 0 | - |
| PLGA Female 1 | Brain | No changes | 0 | 1 | - |
| Kidney | No changes | 0 | 0 | - |
| Lung | No changes | 0 | 0 | - |
| Thymus | No changes | 0 | 0 | - |
| Spleen | Spleen; Hemossiderosis, multifocal, mild; Golden Nanoparticles acumulation, multifocal, macrophages (red pulp) and endothelial cells, minimal; Adipose tissue: Mononuclear inflammatory cell infiltration, focally extensive | n.a | 1 | Background lesion, non-adverse |
| Heart | No changes | 0 | 0 | - |
| Liver | Liver: hepatocyte, glycogen depletion; diffuse | n.a | 0 | - |
| PLGA Female 2 | Brain | No changes | 0 | 1 | - |
| Kidney | No changes | 0 | 0 | - |
| Lung | No changes | 0 | 0 | - |
| Thymus | No changes | 0 | 0 | - |
| Spleen | Spleen; Hemossiderosis, multifocal, mild; Golden Nanoparticles acumulation, multifocal, macrophages (red pulp) and endothelial cells, minimal; Adipose tissue: Mononuclear inflammatory cell infiltration, focally extensive | n.a | 1 | Background lesion, non-adverse |
| Heart | No changes | 0 | 0 | - |
| Liver | Liver: Mononuclear inflammator cell infiltration; Hepatocellular necrosis; multifocal, minimal; hepatocyte, glycogen depletion, diffuse | 1 | 0 | - |
| PLGA Female 3 | Brain | No changes | 0 | 1 | - |
| Kidney | No changes | 0 | 0 | - |
| Lung | No changes | 0 | 0 | - |
| Thymus | No changes | 0 | 0 | - |
| Spleen | Spleen: Hemossiderosis, minimal | n.a | 0 | Background lesion, non-adverse |
| Heart | No changes | 0 | 0 | - |
| Liver | Liver: Mononuclear inflammatory cell infiltration, multifocal | 1 | 0 | Background lesion, non-adverse |
| PLGA Female 4 | Brain | No changes | 0 | 1 | - |
| Kidney | No changes | 0 | 0 | - |
| Thymus | No changes | 0 | 0 | - |
| Lung | No changes | 0 | 0 | - |
| Spleen | Spleen; Hemossiderosis, multifocal, mild; Golden Nanoparticles acumulation, multifocal, macrophages (red pulp) and endothelial cells, minimal; Adipose tissue: Mononuclear inflammatory cell infiltration, focally extensive | n.a | 1 | Background lesion, non-adverse |
| Heart | No changes | 0 | 0 | - |
|  | Liver | Liver: hepatocyte, glycogen depletion; diffuse | n.a | 0 | - |
| SLN Male 1 | Brain | No changes | 0 | 3 | - |
| Kidney | No changes | 0 | 0 | - |
| Lung | Adipose tissue: Steatitis, multifocal, chronic, mild | 0 | 0 | - |
| Thymus | No changes | 0 | 0 | - |
| Spleen | Spleen; Hemossiderosis, multifocal, mild; Golden Nanoparticles acumulation, multifocal, macrophages (red pulp) and endothelial cells, moderate; Adipose tissue: Mononuclear inflammatory cell infiltration, focally extensive | n.a | 3 | Background lesion, non-adverse |
| Heart | No changes | 0 | 0 | - |
| Liver | Liver: Golden nanoparticle accumulation, hepatocytes and endothelial cells, multifocal, mild; hepatocyte, glycogen depletion, diffuse | n.a | 2 | - |
| SLN Male 2 | Brain | No changes | 0 | 3 | - |
| Kidney | No changes | 0 | 0 | - |
| Lung | No changes | 0 | 0 | - |
| Thymus | No changes | 0 | 0 | - |
| Spleen | Spleen; Hemossiderosis, multifocal, mild; Golden Nanoparticles acumulation, multifocal, macrophages (red pulp) and endothelial cells, moderate; Adipose tissue: Mononuclear inflammatory cell infiltration, focally extensive | n.a | 3 | Background lesion, non-adverse |
| Heart | No changes | 0 | 0 | - |
| Liver | Liver: Mononuclear inflammatory cell infiltration, multifocal, mild; Golden nanoparticle accumulation, hepatocytes and endothelial cells, multifocal, mild | 2 | 2 | Background lesion, non-adverse |
| SLN Male 3 | Brain | No changes | 0 | 3 | - |
| Kidney | Adipose tissue: Steatitis, focally extensive, chronic, mild | 2 | 0 | - |
| Lung | No changes | 0 | 0 | - |
| Thymus | No changes | 0 | 0 | - |
| Spleen | Spleen; Hemossiderosis, multifocal, mild; Golden Nanoparticles acumulation, multifocal, macrophages (red pulp) and endothelial cells, moderate; Adipose tissue: Mononuclear inflammatory cell infiltration, focally extensive | n.a | 3 | Background lesion, non-adverse |
| Heart | No changes | 0 | 0 | - |
| Liver | Liver: Golden nanoparticle accumulation, hepatocytes and endothelial cells, multifocal, mild; hepatocyte, glycogen depletion, diffuse | n.a | 2 | - |
| SLN Male 4 | Brain | No changes | 0 | 3 | - |
| Kidney | No changes | 0 | 0 | - |
| Lung | No changes | 0 | 0 | - |
| Thymus | No changes | 0 | 0 | - |
| Spleen | Spleen; Hemossiderosis, multifocal, mild; Golden Nanoparticles acumulation, multifocal, macrophages (red pulp) and endothelial cells, moderate; Adipose tissue: Mononuclear inflammatory cell infiltration, focally extensive | n.a | 3 | Background lesion, non-adverse |
| Heart | No changes | 0 | 0 | - |
| Liver | Liver: Mononuclear inflammatory cell infiltration, multifocal, mild; Golden nanoparticle accumulation, hepatocytes and endothelial cells, multifocal, mild; hepatocyte, glycogen depletion, diffuse | 2 | 2 | Background lesion, non-adverse |
| SLN Female 1 | Brain | No changes | 0 | 3 | Background lesion, non-adverse |
| Kidney | Adipose tissue: Steatitis, focally extensive, chronic, mild | 2 | 0 | - |
| Lung | No changes | 0 | 0 | - |
| Thymus | No changes | 0 | 0 | - |
| Spleen | Spleen; Hemossiderosis, multifocal, mild; Golden Nanoparticles acumulation, multifocal, macrophages (red pulp) and endothelial cells, moderate; Adipose tissue: Mononuclear inflammatory cell infiltration, focally extensive | n.a | 3 | Background lesion, non-adverse |
| Heart | No changes | 0 | 0 | - |
| Liver | Liver: Mononuclear inflammatory cell infiltration, multifocal, mild; Golden nanoparticle accumulation, hepatocytes and endothelial cells, multifocal, minimal | 2 | 1 | Background lesion, non-adverse |
| SLN Female 2 | Brain | No changes | 0 | 3 | - |
| Kidney | Adipose tissue: Steatitis, focally extensive, chronic, mild | 2 | 0 | Background lesion, non-adverse |
| Lung | No changes | 0 | 0 | - |
| Thymus | No changes | 0 | 0 | - |
| Spleen | Spleen; Hemossiderosis, multifocal, mild; Golden Nanoparticles acumulation, multifocal, macrophages (red pulp) and endothelial cells, moderate; Adipose tissue: Mononuclear inflammatory cell infiltration, focally extensive | n.a | 3 | Background lesion, non-adverse |
| Heart | No changes | 0 | 0 | - |
| Liver | Liver: Mononuclear inflammatory cell infiltration, multifocal, mild; Golden nanoparticle accumulation, hepatocytes and endothelial cells, multifocal, mild, hepatocyte, glycogen depletion, diffuse | 2 | 2 | Background lesion, non-adverse |
| SLN Female 3 | Brain | No changes | 0 | 3 | - |
| Kidney | Adipose tissue: Steatitis, chronic, focally extensive, mild | 0 | 0 | - |
| Lung | No changes | 0 | 0 | - |
| Thymus | No changes | 0 | 0 | - |
| Spleen | Spleen; Hemossiderosis, multifocal, mild; Golden Nanoparticles acumulation, multifocal, macrophages (red pulp) and endothelial cells, moderate; Adipose tissue: Mononuclear inflammatory cell infiltration, focally extensive | n.a | 3 | Background lesion, non-adverse |
| Heart | No changes | 0 | 0 | - |
| Liver | Liver: Mononuclear inflammatory cell infiltration, multifocal, mild; Golden nanoparticle accumulation, hepatocytes and endothelial cells, multifocal, mild, hepatocyte, glycogen depletion, diffuse | 2 | 2 | Background lesion, non-adverse |
| SLN Female 4 | Brain | No changes | 0 | 3 | - |
| Kidney | Adipose tissue: Steatitis, chronic, focally extensive, mild | 2 | 0 | - |
| Lung | No changes | 0 | 0 | - |
| Thymus | No changes | 0 | 0 | - |
| Spleen | Spleen; Hemossiderosis, multifocal, mild; Golden Nanoparticles acumulation, multifocal, macrophages (red pulp) and endothelial cells, moderate; Adipose tissue: Mononuclear inflammatory cell infiltration, focally extensive | n.a | 3 | Background lesion, non-adverse |
| Heart | No changes | 0 | 0 | - |
| Liver | Liver: Mononuclear inflammatory cell infiltration, multifocal, minimal; Golden nanoparticle accumulation, hepatocytes and endothelial cells, multifocal, mild; hepatoyte, glycogen depletion, diffuse | 1 |  | Background lesion, non-adverse |
